# Supplementary material for: Coupling abundant active sites and an ultra-short ion diffusion path: R–VO 2 /carbon nanotube composite microspheres boosted the performance of aqueous ammonium-ion batteries
Source: Royal Society of Chemistry journal article supplement (doi:10.1039/d5sc08747c), 2026-01-01
Supplement: d5sc08747c1.pdf [file d5sc08747c1.pdf]

# **Coupling abundant active sites and Ultra-short ion diffusion path: R-VO<sub>2</sub>/carbon nanotubes composite microspheres boosted high performance aqueous ammonium-ion batteries**

Lin-bo Tang<sup>1, 2#</sup>, Xian-kai Fan<sup>1, 3#</sup>, Kai-xiong Xiang<sup>4</sup>, Wei Zhou<sup>1</sup>, Wei-na Deng<sup>1</sup>, Hai Zhu<sup>1</sup>, Liang Chen<sup>1</sup>, Jun-chao Zheng<sup>2\*</sup>, Han Chen<sup>1\*</sup>

<sup>1</sup>School of Materials and Environmental Engineering, Changsha University, Changsha 410022, PR China

<sup>2</sup>School of Metallurgy and Environment, Central South University, Changsha, Hunan, 410083, China

<sup>3</sup>College of Energy Materials and Chemistry, Inner Mongolia University, Hohhot, Inner Mongolia, 011123, PR China

<sup>4</sup>Liling Ceramic Institute, Hunan University of Technology, Zhuzhou, Hunan, 412007, PR China

Corresponding author: jc Zheng@csu.edu.cn (J. C. Zheng); lzdxcnchh@126.com (H. Chen).

#Lin-bo Tang and Xian-kai Fan contributed equally to this study.

## **1. Material Characterizations**

The crystallographic characterizations were measured by X-ray diffraction (Bruker D8 Advance X-ray diffractometer; Cu K $\alpha$ ;  $\lambda = 0.152\text{nm}$ ). Raman spectra were tested by a confocal Raman microscope (Renishaw Via Raman microscope; RM 1000-Invia; range of 100-2000 cm<sup>-1</sup>;  $\lambda=785\text{ nm}$ ). The FT-IR spectra were analyzed by vertex-70 (Bruker; range of 400-4000 cm<sup>-1</sup>). Transmission electron microscopy (TEM), high-resolution transmission electron microscopy (TEM, JEOL-2100F, 200 kV) images were observed

with a microscope (JEM2100F STEM/EDS). Energy dispersive X-ray spectra (EDS) were collected by an EDS system (Oxford EDS IE250). Field emission scanning electron microscopy (FESEM) pictures were observed by a microscope (FE-SEM, JEOL JSM-7500F). X-ray photoelectron spectroscopy (XPS) was performed on an system equipped (Escalab 250Xi; monochromatic Al K $\alpha$ ; 1486.6eV). The contents of materials were determined using thermogravimetric analysis (TGA, Shimadzu DTG-60H).

## 2. Electrochemical Measurements

The cathodes were premier fabricated by making the slurry of 80 wt% R-VO<sub>2</sub> microspheres or R-VO<sub>2</sub>/CNTs composite microspheres, 10 wt% acetylene black, and 10 wt% polyvinylidene fluoride (PVDF) and N-methyl pyrrolidone(NMP), the slurry was then spread on stainless steel (SUS 304) foil and dried for 24 h at 80 °C in a vacuum oven.

The anodes were premier fabricated by making the slurry of 80 wt% active carbon or UP, 10 wt% acetylene black, and 10 wt% polyvinylidene fluoride (PVDF) and N-methyl pyrrolidone(NMP), the slurry was then spread on stainless steel (SUS 304) foil and dried for 24 h at 80 °C in a vacuum oven.

*Button battery (CR2016-type):* The (NH<sub>4</sub>)<sub>2</sub>SO<sub>4</sub> aqueous solution of 0.5 mol L<sup>-1</sup> was used as electrolyte and glass fiber film were used as separator. The CR2016 coin batteries were assembled in the dry atmosphere.

*Three-electrode test system:* The R-VO<sub>2</sub> microspheres, active carbon and Ag/AgCl electrode were respectively employed as the working electrodes, counter electrodes and

reference electrodes, and the 0.5 mol L<sup>-1</sup> K<sub>2</sub>SO<sub>4</sub>, Na<sub>2</sub>SO<sub>4</sub> and (NH<sub>4</sub>)<sub>2</sub>SO<sub>4</sub> aqueous solution were employed as the electrolytes.

The charge-discharge tests and the Galvanostatic Intermittent Titration Technique (GITT) were employed by means of NEWARE battery testing systems. Cyclic voltammetry (CV) and AC impedance (AC) were measured on an electrochemical workstation (CHI760E). All the tests are done at room temperature.

### **3. Density functional theory calculations**

All calculations were based on density functional theory (DFT), using the Vienna ab initio Simulation Package (VASP) code. The exchange and correlation terms were described using general gradient approximation (GGA) in the scheme of Perdew-Burke-Ernzerhof (PBE). Core electrons were described by pseudopotentials generated from the projector augmented wave method, and valence electrons were expanded in a plane-wave basis set with an energy cutoff of 400 eV. The DFT+U method was employed to optimize the structure, in which the onsite parameter  $U_{\text{eff}} (= U - J)$  was chosen to be 4.2 eV for the V 3d electron. The relaxation is carried out until all forces on the free ions are converged to 0.01 eV/Å. A 2×2×2 VO<sub>2</sub> supercell (V<sub>16</sub>O<sub>32</sub>) was used to calculate the diffusion properties of cations. Climbing Image Nudged Elastic Band (CI-NEB) method was used to find the minimum energy paths and the transition states for diffusion of cations in VO<sub>2</sub>, with a force converge < 0.01 eV/Å. During the CI-NEB calculation, all the structures are allowed to relax within the fixed lattice parameters.

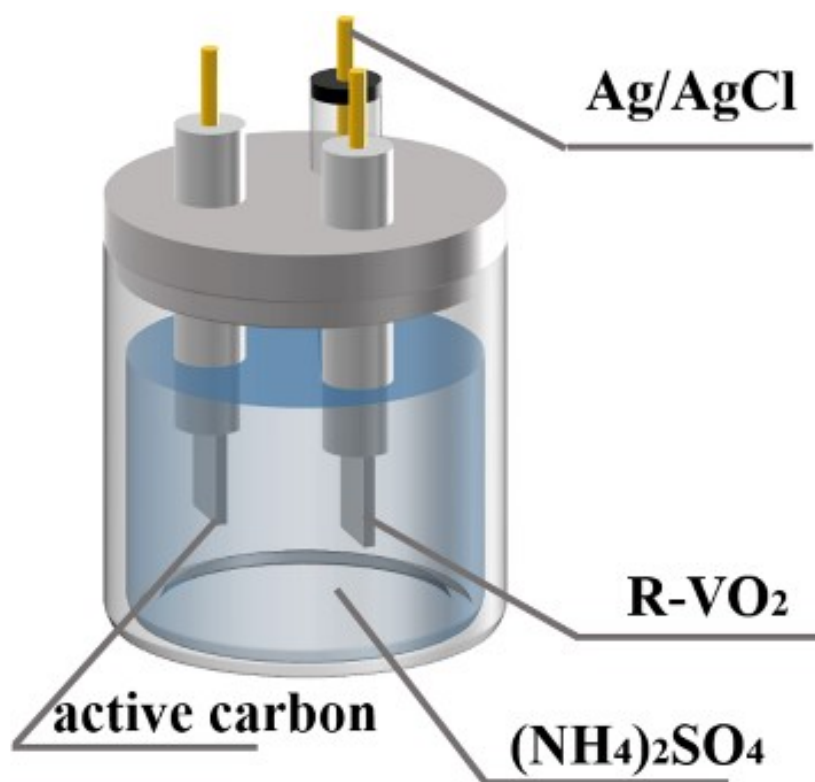

**Figure S1.** Schematic diagram of three-electrode test system

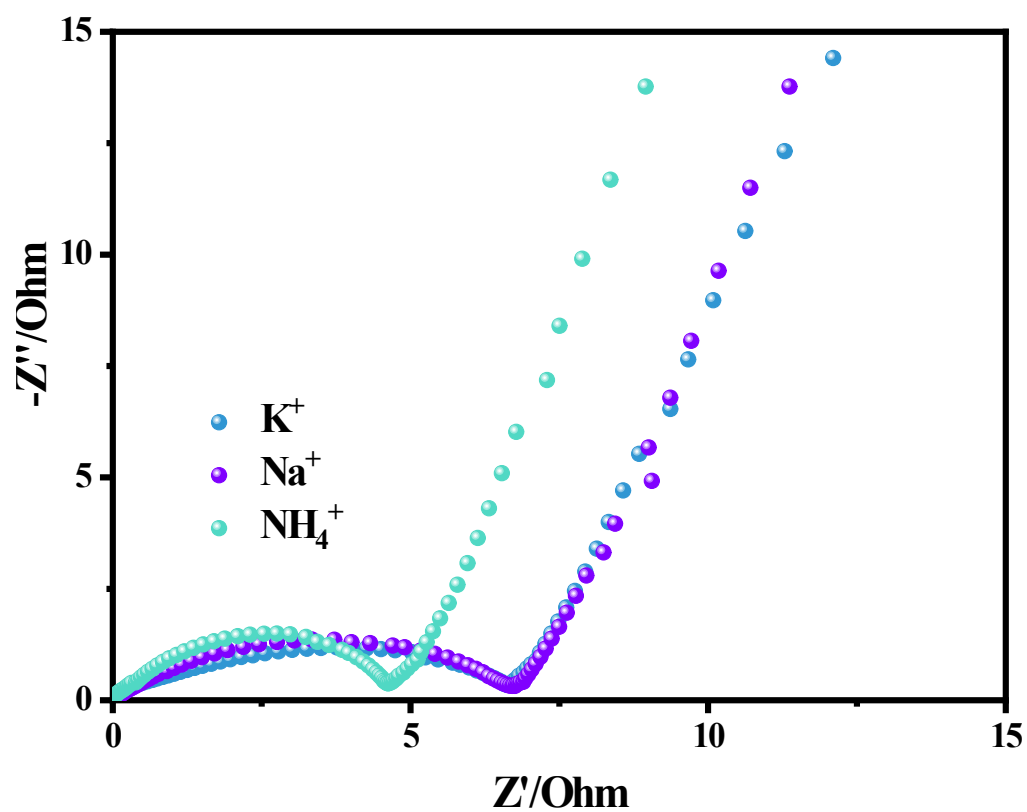

**Figure S2.** the electrochemical impedance spectroscopy (EIS) (c) for three charge carriers of  $K^+$ ,  $Na^+$ ,  $NH_4^+$  ions

**Figure S3.** Cyclic voltammetry (CV) curves at various scan rates from 0.1 to 1.0 mV s<sup>-1</sup> for K<sup>+</sup> (a) and Na<sup>+</sup> (d) to R-VO<sub>2</sub>, log (i) versus log (v) curves of cathodic peaks for K<sup>+</sup> (b) and Na<sup>+</sup> (e), surface-controlled and diffusion-controlled contributions to capacity for K<sup>+</sup> (c) and Na<sup>+</sup> (f)

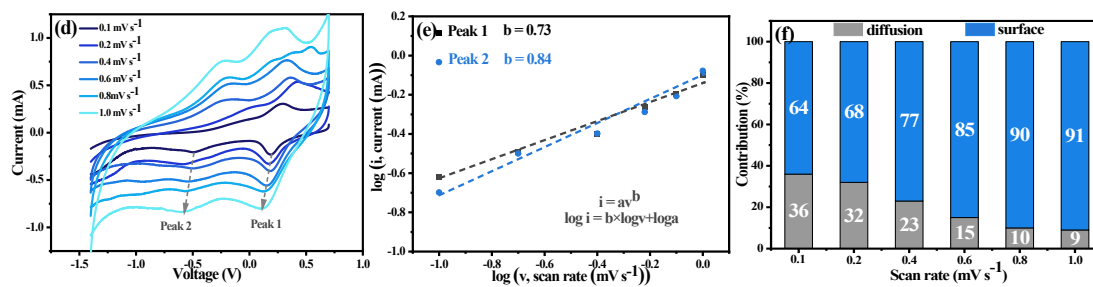

**Figure S4.** CV curves at various scan rates from 0.1 to 1.0 mV s<sup>-1</sup> for R-VO<sub>2</sub> microspheres (a), log (*i*) versus log (*v*) curves of cathodic peaks for R-VO<sub>2</sub> microspheres (b), surface-controlled and diffusion-controlled contributions to capacity for R-VO<sub>2</sub> microspheres (c)

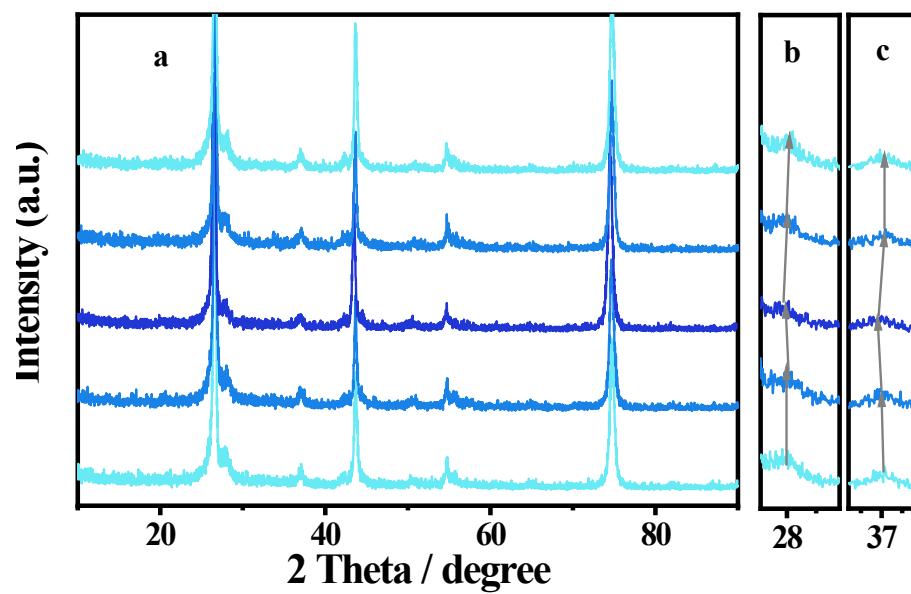

**Figure S5.** Ex situ XRD patterns of R-VO<sub>2</sub> microspheres



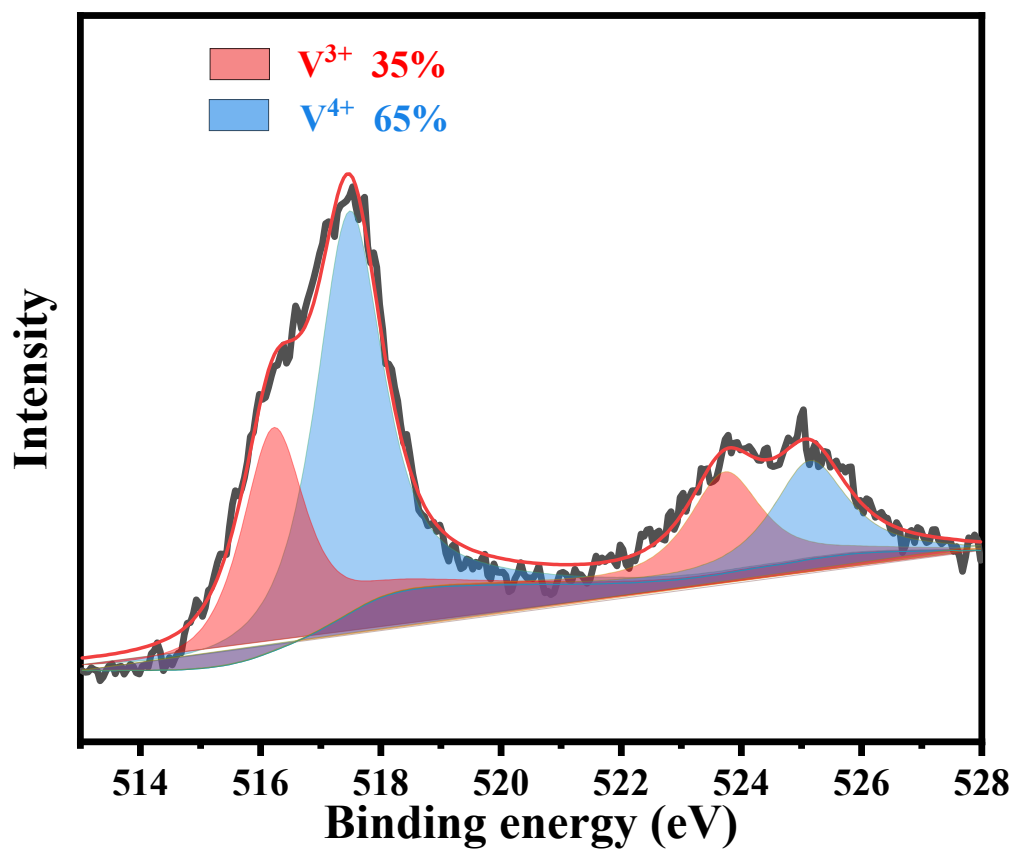

**Figure S6.** XPS patterns of R-VO<sub>2</sub> microspheres at discharged state

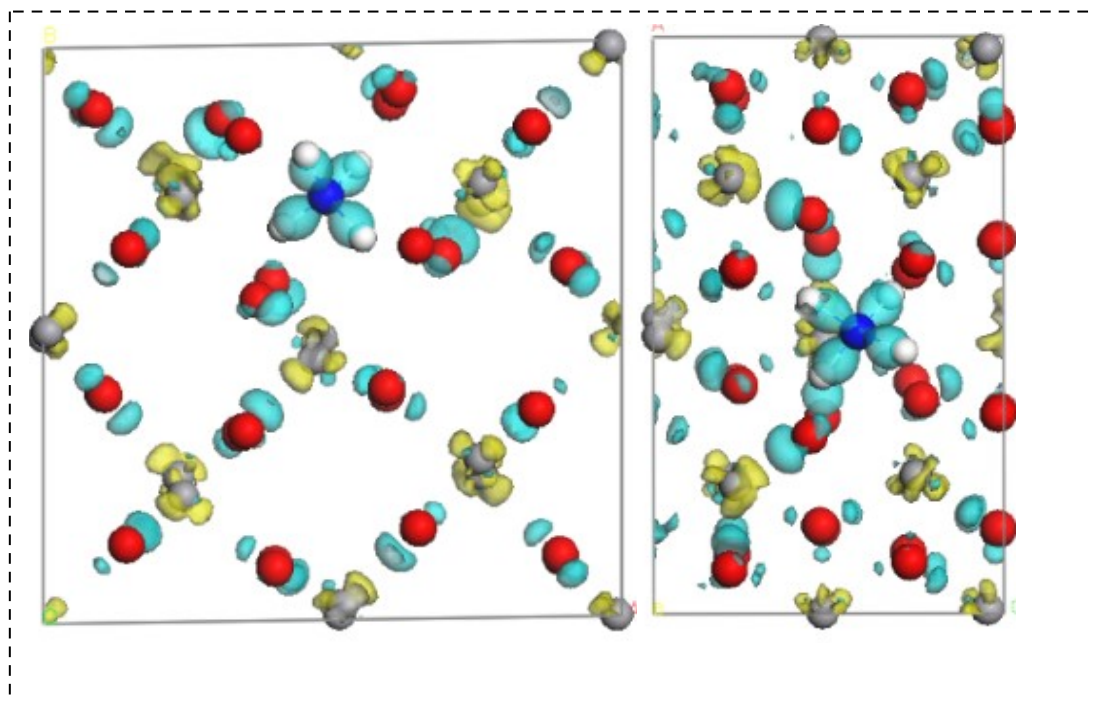

**Figure S7.** Diagram of charge density difference of  $\text{NH}_4^+$  inserted  $\text{R-VO}_2$

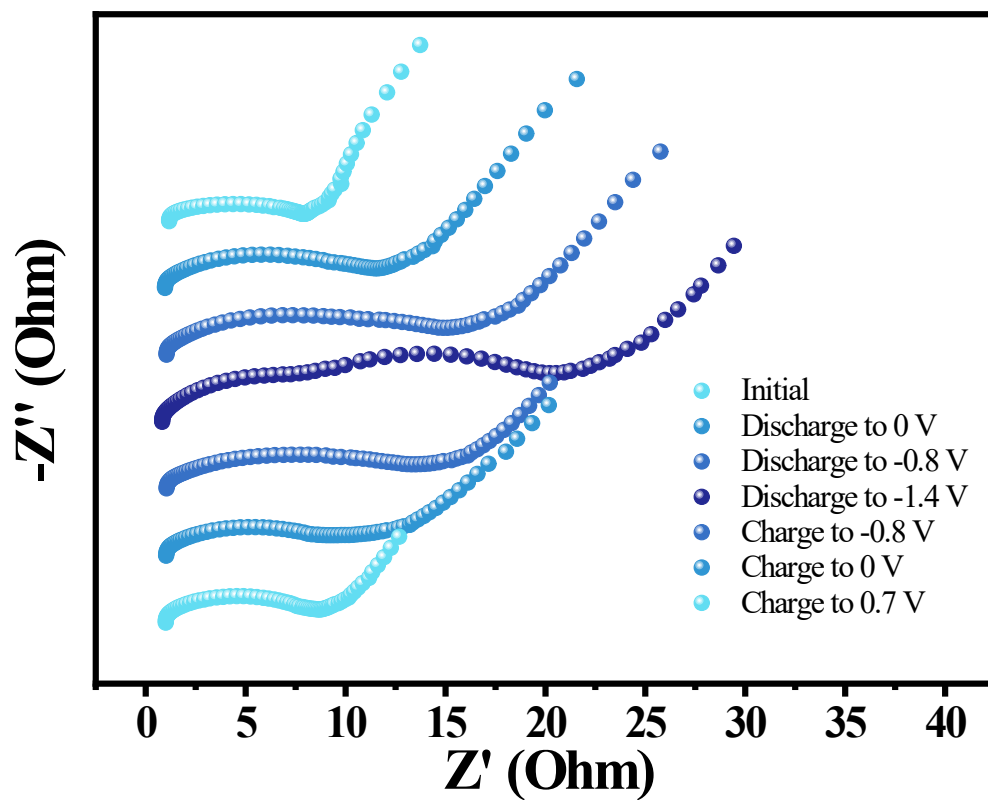

**Figure S8.** In situ electrochemical impedance of R-VO<sub>2</sub> microspheres during the first cycle

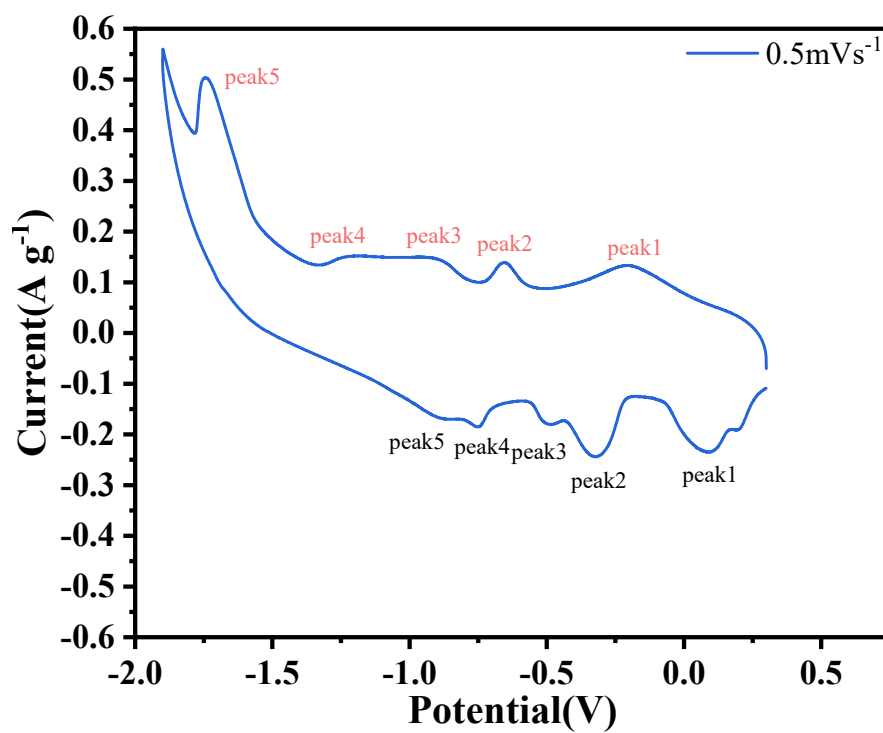

**Figure S9.** The CV curve of UP anode

**Table S1.** The fitting results of electrochemical impedance spectroscopy for two microspheres

|  |           |           |
|--|-----------|-----------|
|  |           |           |
|  |           |           |
|  | 0.76883   | 0.83044   |
|  | 2.281     | 3.869     |
|  | 1.596 E-4 | 9.1621E-5 |
|  | 0.8448    | 0.92097   |
|  | 6.15      | 7.814     |
|  | 0.1795    | 0.17622   |
|  | 0.46131   | 0.51516   |

**Table S2.** The fitting results of in situ EIS for R-VO<sub>2</sub>/CNTs composite microspheres

|          |           |           |           |            |           |           |
|----------|-----------|-----------|-----------|------------|-----------|-----------|
| 0.76883  | 0.79217   | 0.8002    | 0.87252   | 0.79445    | 0.77114   | 0.71999   |
| 2.281    | 3.272     | 3.96772   | 6.142     | 5.458      | 3.638     | 2.065     |
| 1.596E-4 | 1.8464E-4 | 1.8826E-4 | 1.9623E-4 | 1.8963 E-4 | 1.7716E-4 | 1.5088E-4 |
| 0.8448   | 1.062     | 1.12882   | 1.82005   | 0.80951    | 0.8058    | 0.78469   |
|          |           | 10.28     | 10.76     | 10.15      |           |           |
|          |           | 0.0018795 | 0.005992  | 0.0039663  |           |           |
|          |           | 0.42882   | 0.85687   | 0.47827    |           |           |
| 6.15     | 6.564     | 9.73      | 12.2      | 11.342     | 5.96      | 5.622     |
| 0.1795   | 1.141     | 2.1       | 2.892     | 2.223      | 0.255     | 0.20793   |
| 0.46131  | 0.4724    | 0.51877   | 0.6643    | 0.6024     | 0.46516   | 0.45656   |
